# Supplementary material for: Characteristics and sources of nonmethane volatile organic compounds (NMVOCs) and O 3 –NO x –NMVOC relationships in Zhengzhou, China
Source: Copernicus journal article supplement (doi:10.5194/acp-24-8549-2024), 2024-08-01
Supplement: Supplementary file 1 [file acp-24-8549-2024-supplement.pdf]

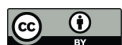

*Supplement of*

## **Characteristics and sources of nonmethane volatile organic compounds (NMVOCs) and O<sub>3</sub>–NO<sub>x</sub>–NMVOC relationships in Zhengzhou, China**

**Dong Zhang et al.**

*Correspondence to:* Ruiqin Zhang (rqzhang@zzu.edu.cn)

The copyright of individual parts of the supplement might differ from the article licence.

## Supplementary Materials

### Table list:

**Table S1.** Results of NMVOCs observed: concentrations with statistical analysis.

**Table S2.** The setup and parameters of the OBM model.

**Table S3.** Source apportionment results of NMVOCs in different cities.

### Figure list:

**Fig. S1.** The location of the observation site.

**Fig. S2.** (a) The  $Q_{\text{true}}/Q_{\text{expected}}$  ratios in different solutions; (b) the  $Q_{\text{true}}/Q_{\text{expected}}$  ratio for different  $F_{\text{peak}}$  value solutions.

**Fig. S3.** Correlation analysis of  $O_3$ , T, and RH.

**Fig. S4.** Diurnal variations of  $O_3$ ,  $NO_x$ , and NMVOCs during the observation period.

**Fig. S5.** Model-simulated average diurnal variations in OH concentrations.

**Fig. S6.** Wind rose diagrams for ethylbenzene, m/p-Xylene, and E/X.

**Fig. S7** CPF plots for the seven factors resolved by the multiple PMF methods.

**Fig. S8.** EKMA curves of the  $O_3$  max concentration.

**Fig. S9.** Response of the  $O_3$  concentration to different AVOCs and  $NO_x$  reduction percentages.

**Table S1.** Results of NMVOCs observed: concentrations with statistical analysis, ppbv.

| Groups    | Species                | Mean $\pm$ SD   | Median | 25%  | 75%  | MCM v3.3.1 name |
|-----------|------------------------|-----------------|--------|------|------|-----------------|
| Alkanes   |                        |                 |        |      |      |                 |
|           | Ethane                 | 3.52 $\pm$ 1.58 | 3.07   | 2.28 | 4.41 | C2H6            |
|           | Propane                | 1.68 $\pm$ 0.9  | 1.44   | 1.03 | 2.12 | C3H8            |
|           | Isobutane              | 0.9 $\pm$ 0.59  | 0.73   | 0.5  | 1.13 | IC4H10          |
|           | n-butane               | 1.1 $\pm$ 0.75  | 0.9    | 0.59 | 1.34 | NC4H10          |
|           | Isopentane             | 1.01 $\pm$ 0.64 | 0.84   | 0.6  | 1.23 | IC5H12          |
|           | n-Pentane              | 0.48 $\pm$ 0.39 | 0.38   | 0.26 | 0.55 | NC5H12          |
|           | 2,2-Dimethylbutane     | 0.02 $\pm$ 0.02 | 0.02   | 0.01 | 0.03 | M22C4           |
|           | Cyclopentane           | 0.08 $\pm$ 0.04 | 0.07   | 0.05 | 0.09 |                 |
|           | 2,3-Dimethylbutane     | 0.03 $\pm$ 0.02 | 0.03   |      | 0.04 | M23C4           |
|           | 2-Methylpentane        | 0.17 $\pm$ 0.11 | 0.14   | 0.1  | 0.2  | M2PE            |
|           | 3-Methylpentane        | 0.1 $\pm$ 0.09  | 0.08   | 0.06 | 0.12 | M3PE            |
|           | n-Hexane               | 0.62 $\pm$ 0.36 | 0.56   | 0.38 | 0.77 | NC6H14          |
|           | Methylcyclopentane     | 0.04 $\pm$ 0.03 | 0.03   | 0.02 | 0.04 |                 |
|           | 2,4-Dimethylpentane    | 0.01 $\pm$ 0.01 | 0.01   | 0.01 | 0.01 |                 |
|           | Cyclohexane            | 0.03 $\pm$ 0.02 | 0.02   | 0.01 | 0.03 | CHEX            |
|           | 2-Methylhexane         | 0.01 $\pm$ 0.01 | 0.01   | 0.01 | 0.02 | M2HEX           |
|           | 2,3-Dimethylpentane    | 0.01 $\pm$ 0.01 | 0.01   | 0.01 | 0.01 |                 |
|           | 3-Methylhexane         | 0.01 $\pm$ 0.01 | 0.01   | 0.01 | 0.02 | M3HEX           |
|           | 2,2,4-Trimethylpentane | 0.02 $\pm$ 0.02 | 0.02   | 0.01 | 0.02 |                 |
|           | n-Heptane              | 0.01 $\pm$ 0.01 | 0.01   | 0.01 | 0.02 | NC7H16          |
|           | Methylcyclohexane      | 0.02 $\pm$ 0.02 | 0.02   | 0.01 | 0.03 |                 |
|           | 2,3,4-Trimethylpentane | 0.01 $\pm$ 0.01 | 0.01   | 0.01 | 0.01 |                 |
|           | 2-Methylheptane        | 0.01 $\pm$ 0    | 0      | 0    | 0.01 |                 |
|           | 3-Methylheptane        | 0.01 $\pm$ 0    | 0.01   | 0    | 0.01 |                 |
|           | Octane                 | 0.02 $\pm$ 0.02 | 0.01   | 0.01 | 0.02 | NC8H18          |
|           | n-Nonane               | 0.01 $\pm$ 0.01 | 0.01   | 0.01 | 0.01 | NC9H20          |
|           | n-Decane               | 0.01 $\pm$ 0    | 0.01   | 0.01 | 0.01 | NC10H22         |
|           | Undecane               | 0.01 $\pm$ 0    | 0.01   | 0.01 | 0.01 | NC11H24         |
|           | Dodecane               | 0.01 $\pm$ 0    | 0.01   | 0.01 | 0.01 | NC12H26         |
| Alkenes   |                        |                 |        |      |      |                 |
|           | 1-Hexene               | 0.13 $\pm$ 0.3  | 0.04   | 0.03 | 0.06 | HEX1ENE         |
|           | Ethylene               | 0.89 $\pm$ 0.52 | 0.82   | 0.49 | 1.14 | C2H4            |
|           | Propylene              | 0.45 $\pm$ 0.57 | 0.22   | 0.12 | 0.66 | C3H6            |
|           | trans-2-Butene         | 0.03 $\pm$ 0.02 | 0.02   | 0.02 | 0.03 | TBUT2ENE        |
|           | 1-Butene               | 0.05 $\pm$ 0.03 | 0.04   | 0.04 | 0.06 | BUT1ENE         |
|           | cis-2-Butene           | 0.02 $\pm$ 0.01 | 0.02   | 0.01 | 0.03 | CBUT2ENE        |
|           | trans-2-Pentene        | 0 $\pm$ 0.01    | 0      | 0    | 0    | TPENT2ENE       |
|           | 1-Pentene              | 0.01 $\pm$ 0.01 | 0.01   | 0    | 0.01 | PENT1ENE        |
|           | cis-2-Pentene          | 0.01 $\pm$ 0.01 | 0      | 0    | 0.01 | CPENT2ENE       |
|           | Isoprene               | 0.38 $\pm$ 0.54 | 0.14   | 0.02 | 0.52 | C5H8            |
|           | 1,3-Butadiene          | 0.01 $\pm$ 0.01 | 0.01   | 0.01 | 0.02 | C4H6            |
| Alkynes   |                        |                 |        |      |      |                 |
|           | Ethyne                 | 1.07 $\pm$ 0.58 | 0.95   | 0.63 | 1.42 | C2H2            |
| Aromatics |                        |                 |        |      |      |                 |
|           | Benzene                | 0.29 $\pm$ 0.14 | 0.25   | 0.19 | 0.36 | BENZENE         |

|                  |                           |             |      |      |      |            |
|------------------|---------------------------|-------------|------|------|------|------------|
|                  | Toluene                   | 0.47 ± 0.33 | 0.36 | 0.25 | 0.57 | TOLUENE    |
|                  | Ethylbenzene              | 0.07 ± 0.05 | 0.05 | 0.03 | 0.08 | EBENZ      |
|                  | m/p-Xylene                | 0.14 ± 0.11 | 0.11 | 0.07 | 0.18 | MXYL       |
|                  | Styrene                   | 0.01 ± 0.01 | 0.01 | 0    | 0.01 | STYRENE    |
|                  | o-Xylene                  | 0.07 ± 0.06 | 0.05 | 0.03 | 0.09 | OXYL       |
|                  | Isopropyl benzene         | 0 ± 0       | 0    | 0    | 0    | IPBENZ     |
|                  | n-Propyl benzene          | 0.01 ± 0    | 0.01 | 0    | 0.01 | PBENZ      |
|                  | 3-Ethyltoluene            | 0.01 ± 0.01 | 0.01 | 0.01 | 0.02 | METHTOL    |
|                  | 4-Ethyltoluene            | 0.01 ± 0.01 | 0.01 | 0    | 0.01 | PETHTOL    |
|                  | 1,3,5-Trimethylbenzene    | 0.01 ± 0    | 0.01 | 0    | 0.01 | TM135B     |
|                  | 2-Ethyltoluene            | 0.01 ± 0    | 0.01 | 0    | 0.01 | OETHTOL    |
|                  | 1,2,4-Trimethylbenzene    | 0.02 ± 0.02 | 0.02 | 0.01 | 0.03 | TM124B     |
|                  | 1,2,3-Trimethylbenzene    | 0.01 ± 0.01 | 0.01 | 0    | 0.01 | TM123B     |
|                  | 1,3-Diethylbenzene        | 0 ± 0       | 0    | 0    | 0    |            |
|                  | 1,4-Diethylbenzene        | 0 ± 0       | 0    | 0    | 0.01 |            |
|                  | Naphthalene               | 0.01 ± 0.01 | 0.01 | 0.01 | 0.02 |            |
| Halohydrocarbons |                           |             |      |      |      |            |
|                  | Freon12                   | 0.13 ± 0.02 | 0.13 | 0.12 | 0.13 |            |
|                  | Freon114                  | 0.12 ± 0.02 | 0.12 | 0.1  | 0.14 |            |
|                  | Chloromethane             | 0.64 ± 0.17 | 0.61 | 0.52 | 0.73 | CH3CL      |
|                  | Vinyl chloride            | 0.02 ± 0.04 | 0.01 | 0.01 | 0.02 | VINCL      |
|                  | Bromomethane              | 0.01 ± 0    | 0.01 | 0.01 | 0.01 | CH3BR      |
|                  | Chloroethane              | 0.02 ± 0.01 | 0.02 | 0.02 | 0.03 | CH3CH2CL   |
|                  | Freon11                   | 0.21 ± 0.02 | 0.21 | 0.21 | 0.22 |            |
|                  | 1,1-Dichloroethylene      | 0 ± 0       | 0    | 0    | 0    | CCL2CH2    |
|                  | Freon113                  | 0.07 ± 0.01 | 0.07 | 0.07 | 0.08 |            |
|                  | Dichloromethane           | 1.06 ± 1.2  | 0.89 | 0.67 | 1.23 | CH2CL2     |
|                  | 1,1-Dichloroethane        | 0.08 ± 0.08 | 0.06 | 0.04 | 0.09 | CHCL2CH3   |
|                  | cis-1,2-Dichloroethylene  | 0 ± 0       | 0    | 0    | 0    | CDICLETH   |
|                  | Chloroform                | 0.74 ± 0.55 | 0.58 | 0.35 | 0.95 | CHCL3      |
|                  | 1,1,1-Trichloroethane     | 0 ± 0       | 0    | 0    | 0    | CH3CCCL3   |
|                  | Tetrachloromethane        | 0.09 ± 0.01 | 0.09 | 0.09 | 0.1  |            |
|                  | 1,2-Dichloroethane        | 0.51 ± 0.33 | 0.42 | 0.31 | 0.62 | CH2CLCH2CL |
|                  | Trichloroethylene         | 0.01 ± 0    | 0.01 | 0    | 0.01 | TRICLETH   |
|                  | 1,2-Dichloropropane       | 0.19 ± 0.16 | 0.15 | 0.11 | 0.22 | CL12PROP   |
|                  | Bromodichloromethane      | 0 ± 0       | 0    | 0    | 0    |            |
|                  | trans-1,3-Dichloropropene | 0.01 ± 0.01 | 0.01 | 0    | 0.01 |            |
|                  | cis-1,3-Dichloropropene   | 0 ± 0       | 0    | 0    | 0    |            |
|                  | 1,1,2-Trichloroethane     | 0.03 ± 0.03 | 0.03 | 0.02 | 0.04 | CH2CLCHCL2 |
|                  | Tetrachloroethylene       | 0.32 ± 0.36 | 0.21 | 0.1  | 0.41 | TCE        |
|                  | 1,2-Dibromoethane         | 0 ± 0       | 0    | 0    | 0    | DIBRET     |
|                  | Chlorobenzene             | 0.01 ± 0    | 0.01 | 0.01 | 0.01 |            |
|                  | Bromoform                 | 0 ± 0       | 0    | 0    | 0    |            |
|                  | 1,1,2,2-Tetrachloroethane | 0 ± 0       | 0    | 0    | 0    | CHCL2CHCL2 |
|                  | 1,3-Dichlorobenzene       | 0 ± 0       | 0    | 0    | 0    |            |
|                  | 1,2-Dichlorobenzene       | 0 ± 0       | 0    | 0    | 0    |            |

|         |                            |             |      |      |      |          |
|---------|----------------------------|-------------|------|------|------|----------|
|         | trans-1,2-Dichloroethylene | 0.01 ± 0    | 0    | 0    | 0.01 |          |
|         | Dibromochloromethane       | 0 ± 0       | 0    | 0    | 0    |          |
|         | 1,4-Dichlorobenzene        | 0.02 ± 0.01 | 0.02 | 0.01 | 0.02 |          |
|         | Benzyl chloride            | 0 ± 0       | 0    | 0    | 0    |          |
|         | 1,2,4-Trichlorobenzene     | 0 ± 0       | 0    | 0    | 0    |          |
|         | Hexachloro-1,3-butadiene   | 0.01 ± 0    | 0.01 | 0.01 | 0.01 |          |
| OVOCs   |                            |             |      |      |      |          |
|         | acetaldehyde               | 0.2 ± 0.15  | 0.16 | 0.1  | 0.24 | CH3CHO   |
|         | n-butyraldehyde            | 0.07 ± 0.1  | 0.05 | 0.04 | 0.06 |          |
|         | 1,4-Dioxane                | 0.01 ± 0    | 0.01 | 0    | 0.01 |          |
|         | Acrolein                   | 0.14 ± 0.07 | 0.12 | 0.09 | 0.16 | ACR      |
|         | propanal                   | 0.33 ± 0.1  | 0.33 | 0.26 | 0.4  | C2H5CHO  |
|         | Acetone                    | 2.74 ± 0.7  | 2.78 | 2.25 | 3.2  | CH3COCH3 |
|         | MTBE                       | 0.04 ± 0.04 | 0.03 | 0.02 | 0.04 | MTBE     |
|         | methylacrolein             | 0.1 ± 0.09  | 0.08 | 0.06 | 0.12 | MACR     |
|         | valeraldehyde              | 0.05 ± 0.02 | 0.05 | 0.04 | 0.06 | C4H9CHO  |
|         | caproaldehyde              | 0.08 ± 0.06 | 0.07 | 0.02 | 0.11 |          |
|         | Isopropanol                | 0.02 ± 0.02 | 0.02 | 0.01 | 0.03 | IPROPOL  |
|         | Vinyl acetate              | 0 ± 0       | 0    | 0    | 0.01 |          |
|         | Ethyl acetate              | 0.24 ± 0.2  | 0.19 | 0.13 | 0.3  | ETHACET  |
|         | 2-Butanone                 | 0.24 ± 0.1  | 0.21 | 0.17 | 0.29 | MEK      |
|         | Tetrahydrofuran            | 0.03 ± 0.02 | 0.02 | 0.01 | 0.03 |          |
|         | Methyl methacrylate        | 0.01 ± 0    | 0.01 | 0    | 0.01 |          |
|         | 4-Methyl-2-pentanone       | 0.01 ± 0.01 | 0.01 | 0.01 | 0.02 | MIBK     |
|         | 2-Hexanone                 | 0.22 ± 0.22 | 0.19 | 0.03 | 0.32 | HEX2ONE  |
|         | Crotonaldehyde             | 0.02 ± 0.02 | 0.02 | 0.01 | 0.03 |          |
|         | benzaldehyde               | 0.01 ± 0    | 0.01 | 0.01 | 0.01 |          |
|         | m-methylbenzaldehyde       | 0 ± 0       | 0    | 0    | 0    |          |
| Sulfide |                            |             |      |      |      |          |
|         | Carbon disulfide           | 0.13 ± 0.22 | 0.06 | 0.03 | 0.12 |          |

**Table S2.** The setup and parameters of the OBM model.

| Parameters                                            | Value                                                                                                                                                                                                                                                                                                                                                                                                                                                                                                                                                                                                                               | Method                      |
|-------------------------------------------------------|-------------------------------------------------------------------------------------------------------------------------------------------------------------------------------------------------------------------------------------------------------------------------------------------------------------------------------------------------------------------------------------------------------------------------------------------------------------------------------------------------------------------------------------------------------------------------------------------------------------------------------------|-----------------------------|
| Latitude                                              | 34.748°                                                                                                                                                                                                                                                                                                                                                                                                                                                                                                                                                                                                                             |                             |
| Longitude                                             | 113.603°                                                                                                                                                                                                                                                                                                                                                                                                                                                                                                                                                                                                                            |                             |
| Output time step interval                             | 1 hour                                                                                                                                                                                                                                                                                                                                                                                                                                                                                                                                                                                                                              |                             |
| Integration time step                                 | <100 seconds                                                                                                                                                                                                                                                                                                                                                                                                                                                                                                                                                                                                                        | Adaptive                    |
| chemical_mechanism                                    |                                                                                                                                                                                                                                                                                                                                                                                                                                                                                                                                                                                                                                     | MCM v3.3.1                  |
| Chemistry solver                                      |                                                                                                                                                                                                                                                                                                                                                                                                                                                                                                                                                                                                                                     | SMV-GEAR                    |
| Output species                                        | NO SO2 NO2 CO O3 C2H6 C3H8 IC4H10 NC4H10<br>NC5H12 M22C4 M23C4 M2PE M3PE NC6H14 CHEX<br>M2HEX M3HEX NC7H16 NC8H18 NC9H20 NC10H22<br>NC11H24 NC12H26 HEX1ENE C2H4 C3H6 TBUT2ENE<br>BUT1ENE CBUT2ENE TPENT2ENE PENT1ENE<br>CPENT2ENE C5H8 C4H6 C2H2 BENZENE TOLUENE<br>EBENZ MXYL OH HONO NO3 H2O2 PAN HCHO HO2<br>STYRENE OXYL IPBENZ PBENZ METHTOL<br>PETHTOL TM135B OETHTOL TM124B TM123B<br>CH3CL VINCL CH3BR CH3CH2CL CCL2CH2 CH2CL2<br>CHCL2CH3 CDICLETH CHCL3 CH3CCL3<br>CH2CLCH2CL TRICLETH CL12PROP CH2CLCHCL2<br>TCE DIBRET CHCL2CHCL2 ACR C2H5CHO<br>CH3COCH3 MTBE MACR C4H9CHO IPROPOL<br>ETHACET MEK MIBK HEX2ONE CH3CHO |                             |
| Gas initial concentration<br>(ppmv)                   | O3: 0.04, NO2: 0.01, HONO: 0.01                                                                                                                                                                                                                                                                                                                                                                                                                                                                                                                                                                                                     |                             |
| Aerosol Initial concentration<br>(µg/m <sup>3</sup> ) | ASO4J: 5.0, ANH4J: 2.0, ASO4I: 0.1, ANH4I: 0.05,<br>ANO3J: 1.0, AECJ: 1.0                                                                                                                                                                                                                                                                                                                                                                                                                                                                                                                                                           |                             |
| Meteorological parameters                             |                                                                                                                                                                                                                                                                                                                                                                                                                                                                                                                                                                                                                                     | Observation<br>interpolated |
| Photolysis rate                                       |                                                                                                                                                                                                                                                                                                                                                                                                                                                                                                                                                                                                                                     | Inline                      |

**Table S3.** Source apportionment results of NMVOCs in different cities.

| Observation sites | Time               | sources               | Contribution (%) | References         |
|-------------------|--------------------|-----------------------|------------------|--------------------|
| Qingdao           | March-May          | vehicular exhaust     | 17-22            | Wu et al. (2023)   |
|                   |                    | solvent usage         | 14-23            |                    |
|                   |                    | industrial production | 12-14            |                    |
| Xuchang           | May-September      | vehicular exhaust     | 16               | Qin et al. (2021)  |
|                   |                    | solvent usage         | 15               |                    |
|                   |                    | industrial production | 16               |                    |
| Guangzhou         | September-November | vehicular exhaust     | 21               | Meng et al. (2022) |
|                   |                    | solvent usage         | 29               |                    |
|                   |                    | industrial production | 13               |                    |
| Nanjing           | July-August        | vehicular exhaust     | 23               | Fan et al. (2021)  |
|                   |                    | solvent usage         | 12               |                    |
|                   |                    | industrial production | 18               |                    |
| Shijiazhuang      | April-August       | vehicular exhaust     | 12               | Guan et al. (2020) |
|                   |                    | solvent usage         | 12               |                    |
|                   |                    | industrial production | 41               |                    |
| Weinan            | July-September     | vehicular exhaust     | 18-21            | Hui et al. (2020)  |
|                   |                    | solvent usage         | 12               |                    |
|                   |                    | industrial production | 13-16            |                    |
| Changzhou         | August-October     | vehicular exhaust     | 39               | Liu et al. (2023)  |
|                   |                    | solvent usage         | 14-19            |                    |
|                   |                    | industrial production | 5-6              |                    |
| Beijing           | July               | vehicular exhaust     | 28               | Liu et al. (2020)  |
|                   |                    | solvent usage         | 7.6              |                    |
|                   |                    | industrial production | -                |                    |

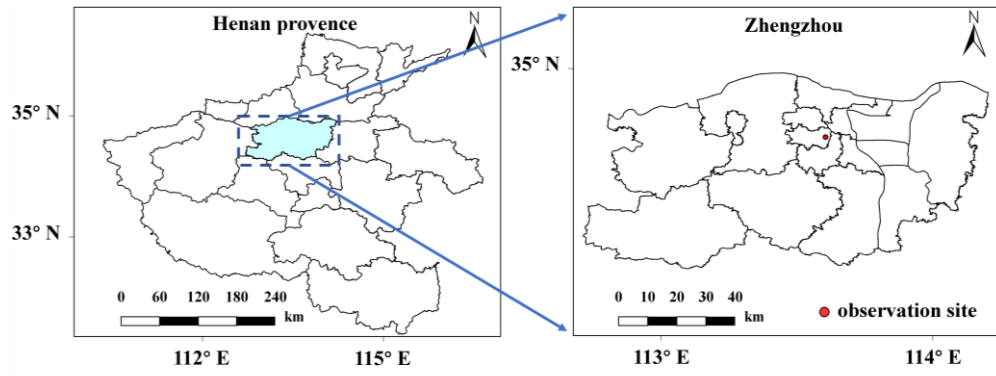

**Fig. S1.** The location of the observation site.



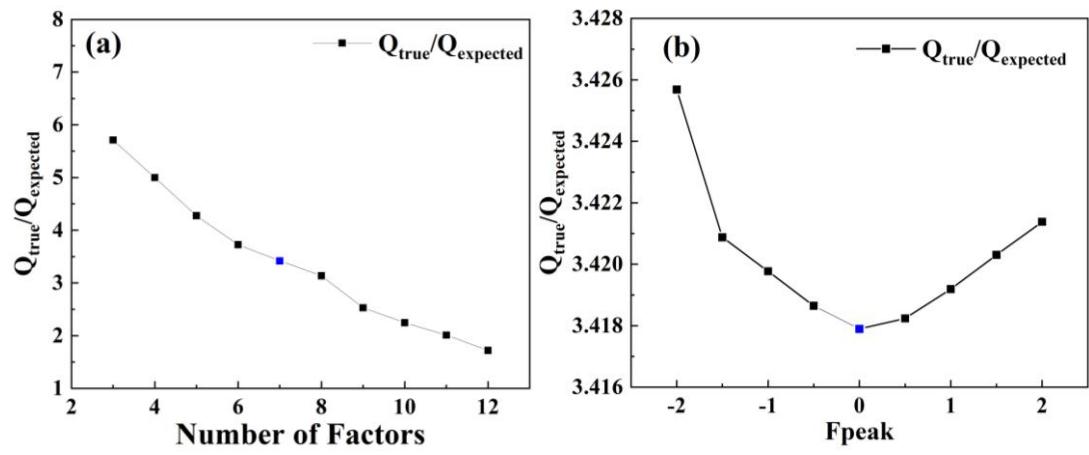

**Fig. S2.** (a) The  $Q_{\text{true}}/Q_{\text{expected}}$  ratios in different solutions; (b) the  $Q_{\text{true}}/Q_{\text{expected}}$  ratio for different Fpeak value solutions.

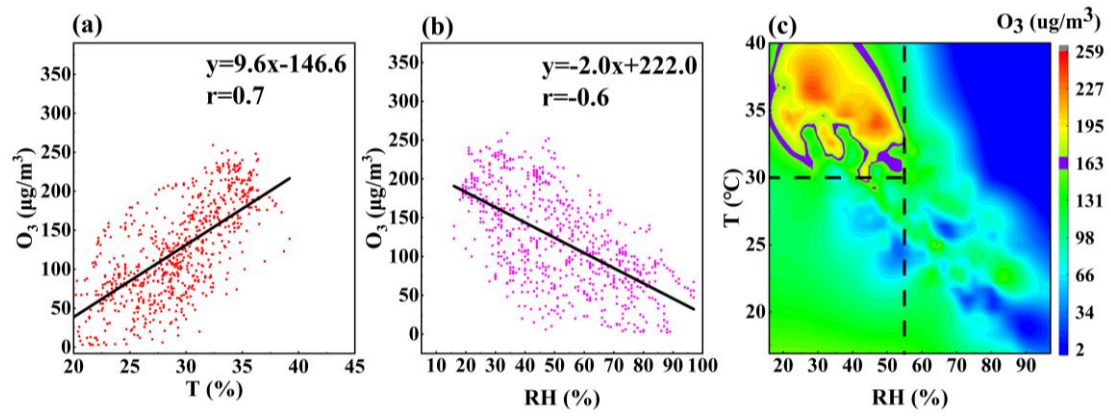

**Fig. S3.** Correlation analysis of  $O_3$ ,  $T$ , and  $RH$ .

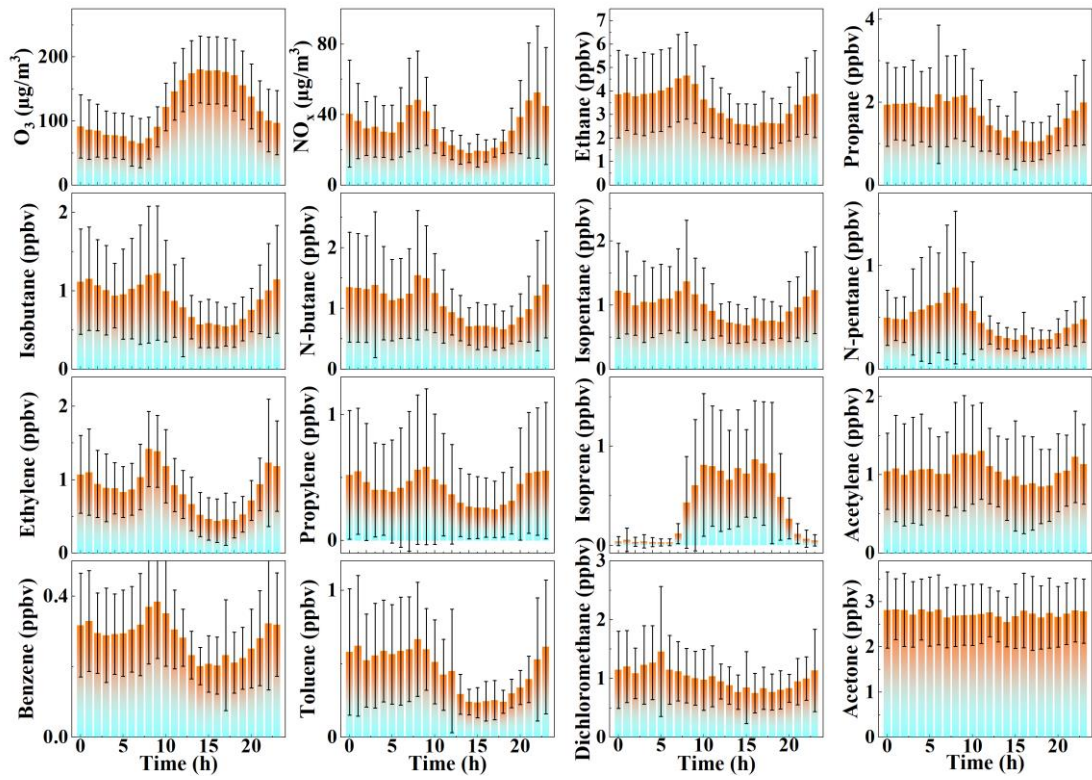

**Fig. S4.** Diurnal variations of  $O_3$ ,  $\text{NO}_x$ , and NMVOCs during the observation period.

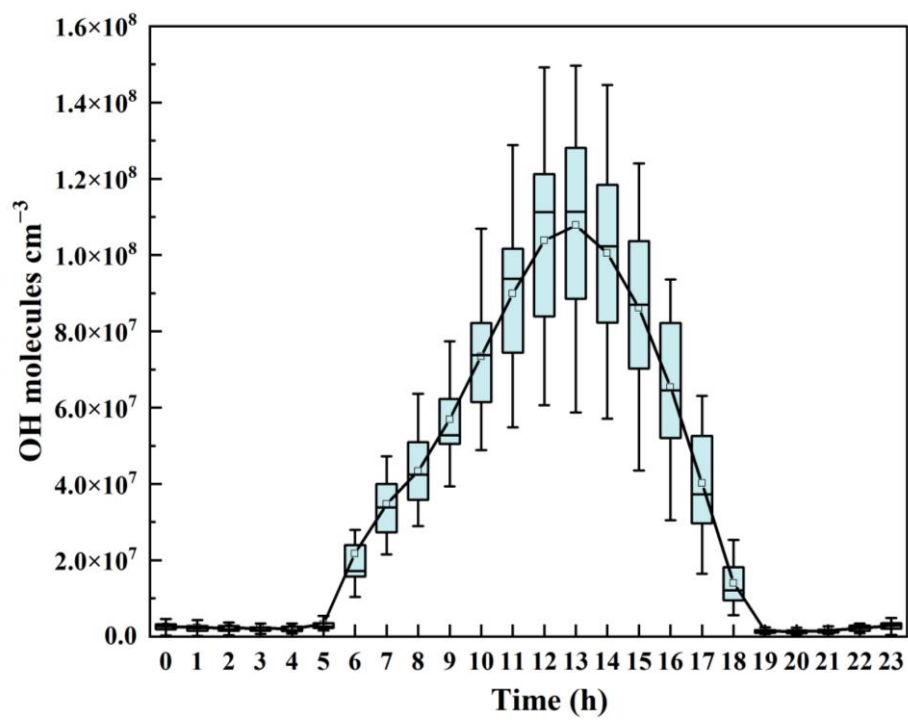

Fig. S5. Model-simulated average diurnal variations in OH concentrations.

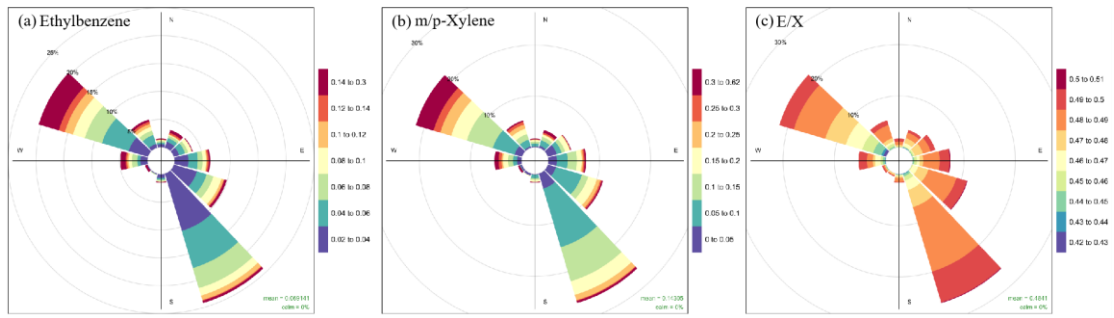

**Fig. S6.** Wind rose diagrams for ethylbenzene, m/p-Xylene, and E/X.

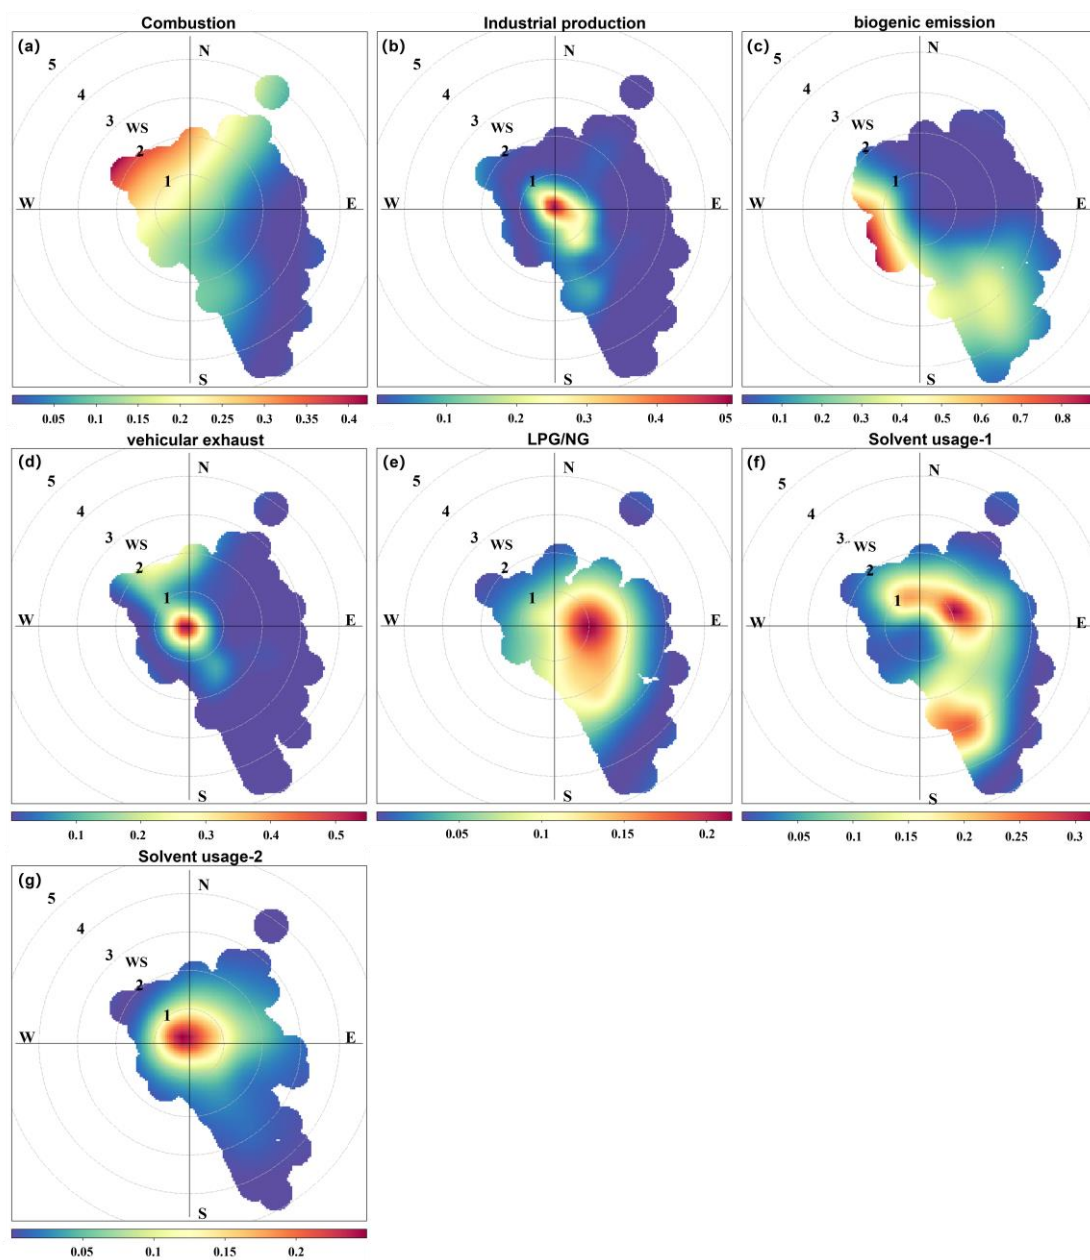

**Fig. S7.** CPF plots for the seven factors resolved by the multiple PMF methods.

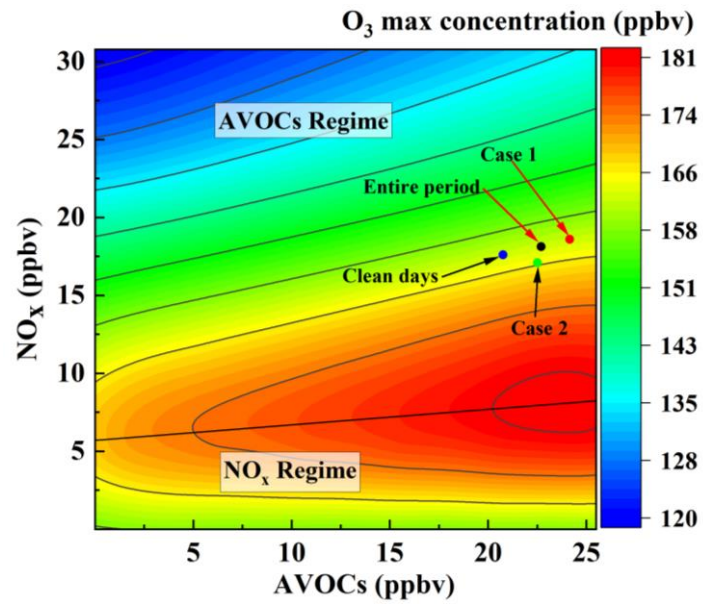

Fig. S8. EKMA curves of the O<sub>3</sub> max concentration.

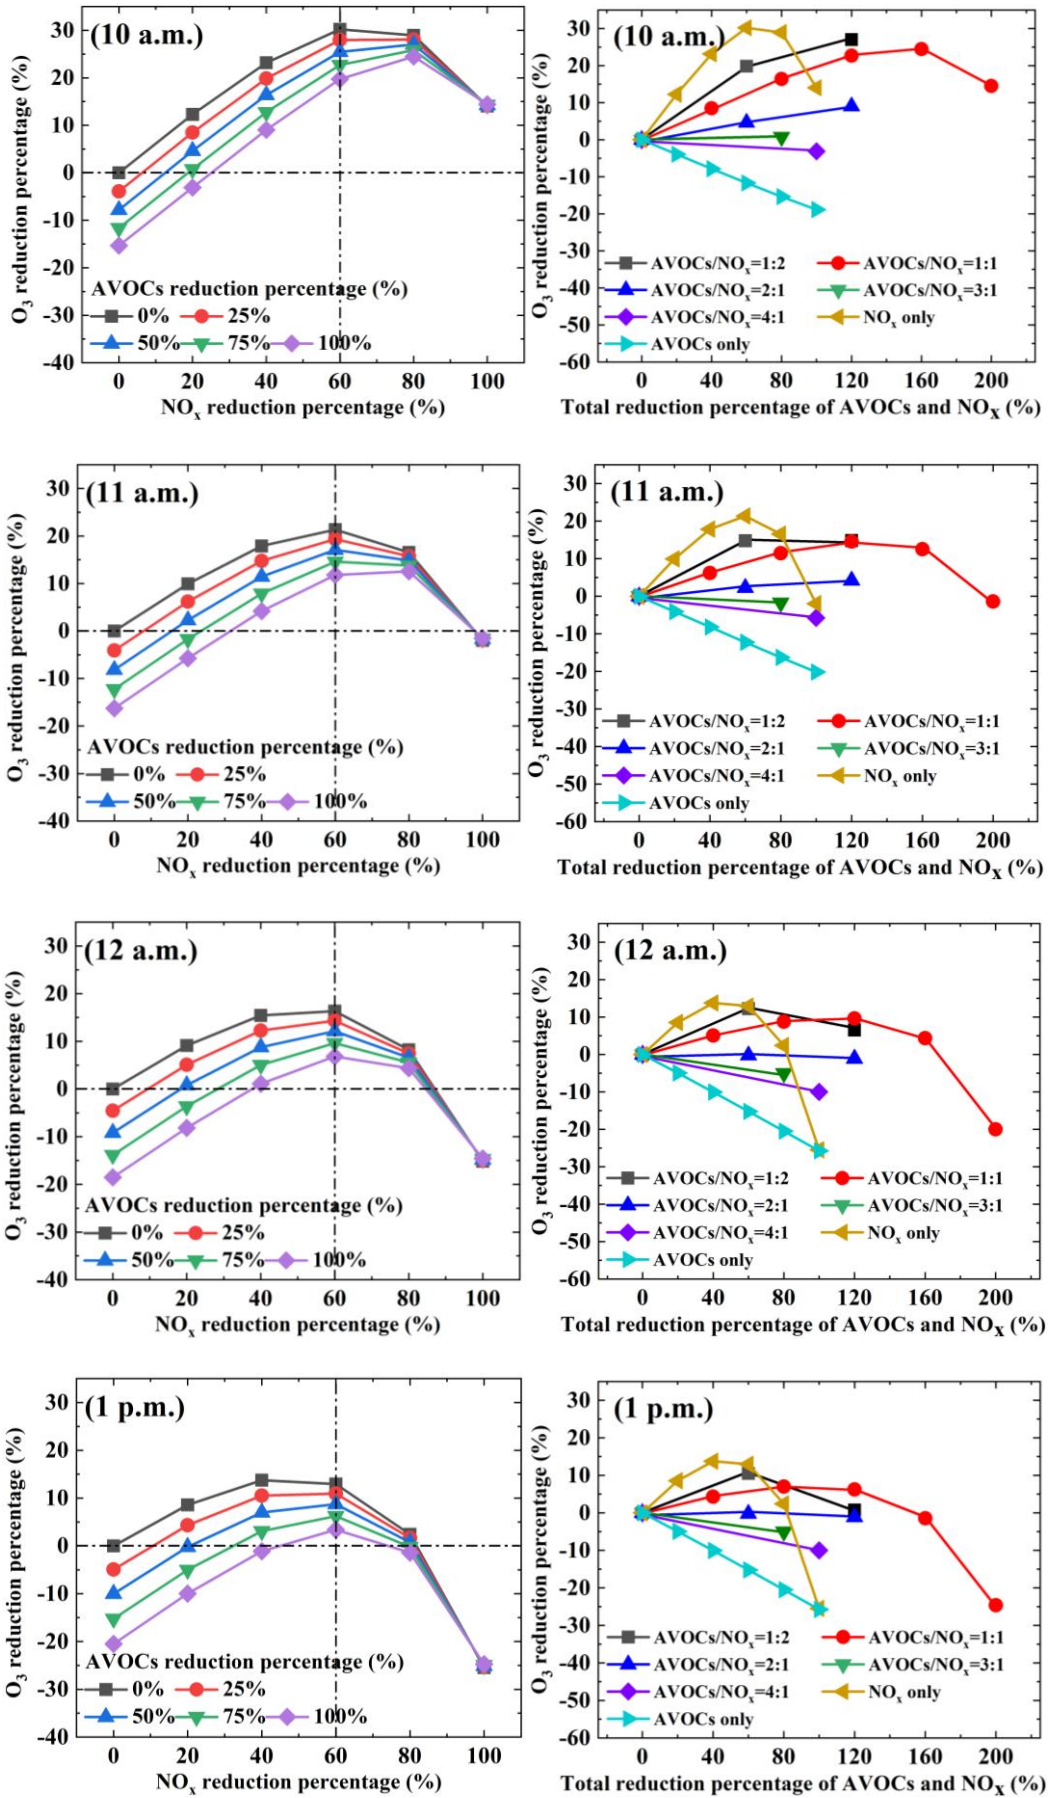



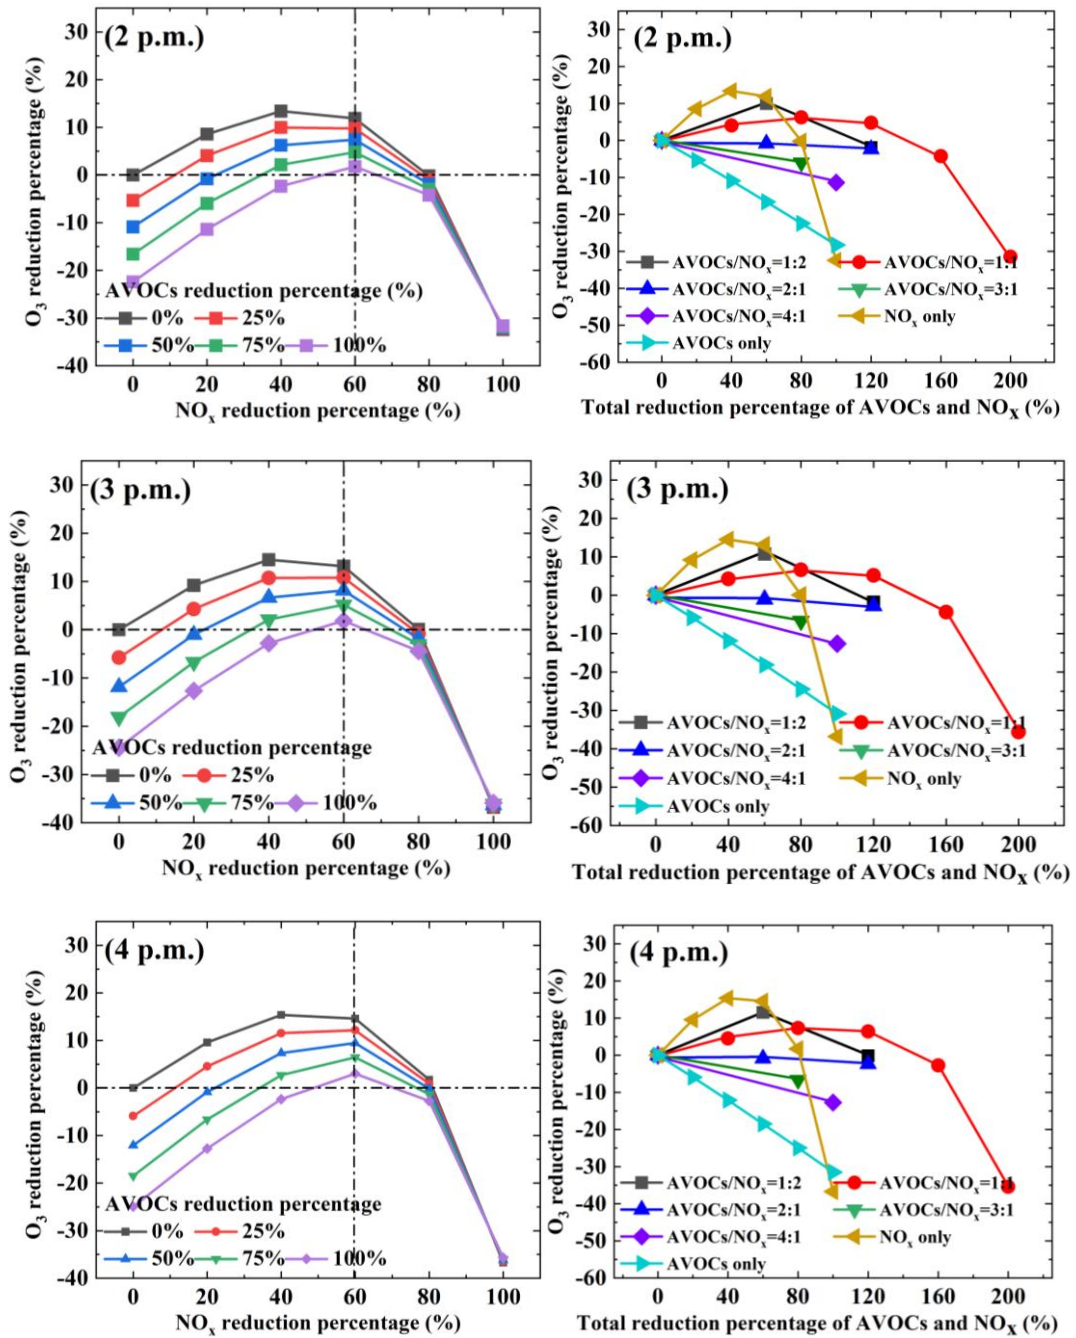

**Fig. S9.** Response of the O<sub>3</sub> concentration to different AVOCs and NO<sub>x</sub> reduction percentages.

## References:

- Fan, M., Zhang, Y., Lin, Y., Li, L., Xie, F., Hu, J., Mozaffar, A., and Cao, F.: Source apportionments of atmospheric volatile organic compounds in Nanjing, China during high ozone pollution season, *Chemosphere*, 263, <https://doi.org/10.1016/j.chemosphere.2020.128025>, 2021.
- Guan, Y., Wang, L., Wang, S., Zhang, Y., Xiao, J., Wang, X., Duan, E., and Hou, L. a.: Temporal variations and source apportionment of volatile organic compounds at an urban site in Shijiazhuang, China, *J. Environ. Sci.*, 97, 25-34, <https://doi.org/10.1016/j.jes.2020.04.022>, 2020.
- Hui, L., Ma, T., Gao, Z., Gao, J., Wang, Z., Xue, L., Liu, H., and Liu, J.: Characteristics and sources of volatile organic compounds during high ozone episodes: A case study at a site in the eastern Guanzhong Plain, China, *Chemosphere*, 265, 129072, <https://doi.org/10.1016/j.chemosphere.2020.129072>, 2020.
- Liu, Y., Song, M., Liu, X., Zhang, Y., Hui, L., Kong, L., Zhang, Y., Zhang, C., Qu, Y., An, J., Ma, D., Tan, Q., and Feng, M.: Characterization and sources of volatile organic compounds (VOCs) and their related changes during ozone pollution days in 2016 in Beijing, China, *Environ. Pollut.*, 257, 113599, <https://doi.org/10.1016/j.envpol.2019.113599>, 2020.
- Liu, Z., Hu, K., Zhang, K., Zhu, S., Wang, M., and Li, L.: VOCs sources and roles in O<sub>3</sub> formation in the central Yangtze River Delta region of China, *Atmos. Environ.*, 302, 119755, <https://doi.org/10.1016/j.atmosenv.2023.119755>, 2023.
- Meng, Y., Song, J., Zeng, L., Zhang, Y., Zhao, Y., Liu, X., Guo, H., Zhong, L., Ou, Y., Zhou, Y., Zhang, T., Yue, D., and Lai, S.: Ambient volatile organic compounds at a receptor site in the Pearl River Delta region: Variations, source apportionment and effects on ozone formation, *J. Environ. Sci.*, 111, 104-117, <https://doi.org/10.1016/j.jes.2021.02.024>, 2022.
- Qin, J., Wang, X., Yang, Y., Qin, Y., Shi, S., Xu, P., Chen, R., Zhou, X., Tan, J., and Wang, X.: Source apportionment of VOCs in a typical medium-sized city in North

China Plain and implications on control policy, *J. Environ. Sci.*, 107, 26-37, <https://doi.org/10.1016/j.jes.2020.10.005>, 2021.

Wu, Y., Liu, B., Meng, H., Dai, Q., Shi, L., Song, S., Feng, Y., and Hopke, P. K.: Changes in source apportioned VOCs during high O<sub>3</sub> periods using initial VOC-concentration-dispersion normalized PMF, *Sci. Total. Environ.*, 896, <https://doi.org/10.1016/j.scitotenv.2023.165182>, 2023.
